# Supplementary material for: Proteomics-derived basal biomarker DNA-PKcs is associated with intrinsic subtype and long-term clinical outcomes in breast cancer
Source: PubMed Central journal article supplement (PMC8429676; doi:10.1038/s41523-021-00320-x), 2021-09-09
Supplement: 41523_2021_320_MOESM2_ESM.pdf [file 41523_2021_320_MOESM2_ESM.pdf]

## **Supplementary Information**

### **Proteomics-derived basal biomarker DNA-PKcs is associated with intrinsic subtype and long-term clinical outcomes in breast cancer**

Karama Asleh, Nazia Riaz, Angela S. Cheng, Dongxia Gao, Samuel C. Y. Leung, Meenakshi Anurag, Torsten O. Nielsen

#### **Supplementary Information includes:**

1. Supplementary Figures (page 2-6)
2. Supplementary Table (pages 7-8)
3. Caption for Supplementary Data 1 (page 9)

## Supplementary Figure 1

a

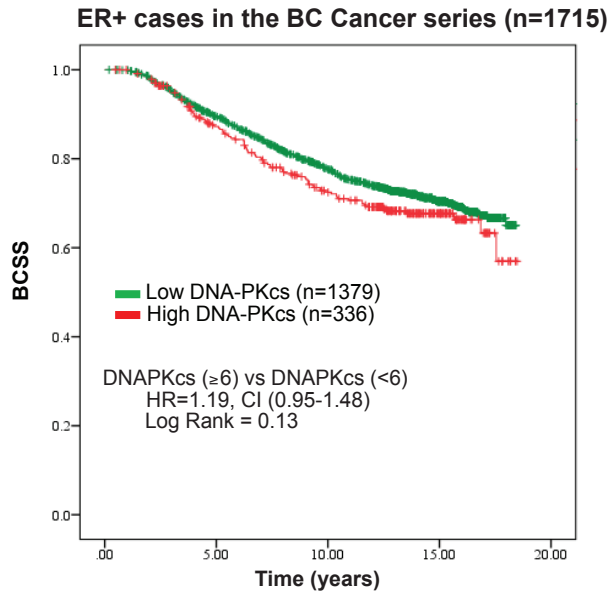

b

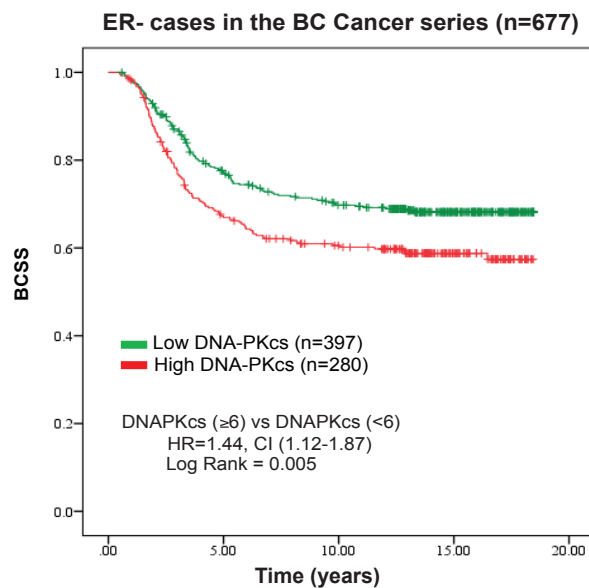

**Supplementary Fig. 1: Prognostic significance of DNA-PKcs expression by immunohistochemistry in different ER subgroups of the BC Cancer series. Kaplan Meier**

curves for BCSS in ER+ cases (a), and ER- cases (b). Abbreviations: BCSS, breast cancer specific survival; ER, estrogen receptor.

## Supplementary Figure 2

Core Basal cases in the BC Cancer series  
(n=234)

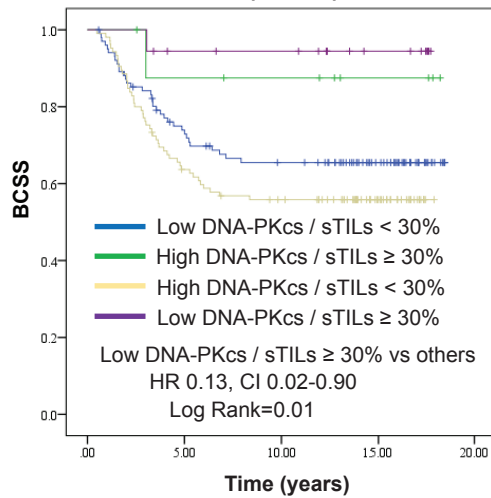

**Supplementary Fig. 2: Prognostic stratification of core basal cases by DNA-PKcs and stromal TILs in the BC Cancer series using a higher (30%) cutpoint.** Within core basal tumors, presence of sTILs ( $\geq 30\%$  vs  $< 30\%$ ) in combination with low DNA-PKcs expression is associated with better BCSS. Abbreviations: BCSS, breast cancer specific survival; HR, hazard ratio, TIL, tumor infiltrating lymphocytes.

### Supplementary Figure 3

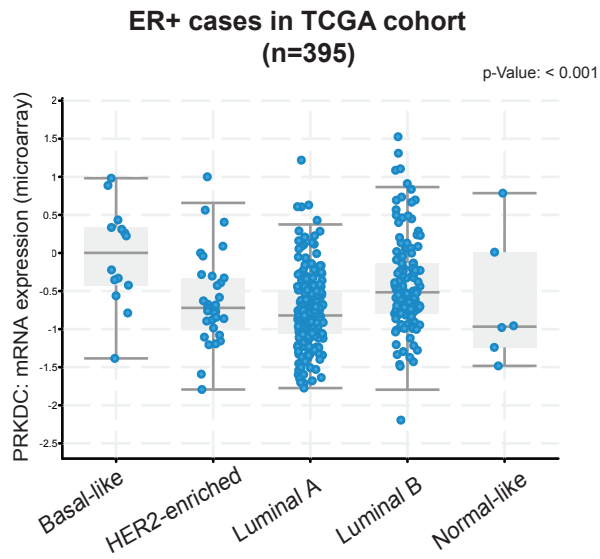

**Supplementary Fig. 3:** Boxplots showing that expression levels of *PRKDC*, as derived from the 395 ER+ breast cancers in TCGA are significantly associated with basal-like PAM50 intrinsic subtype. Centre bar denotes median, and the upper and lower box boundaries delineate the third and first quartiles.

### Supplementary Figure 4

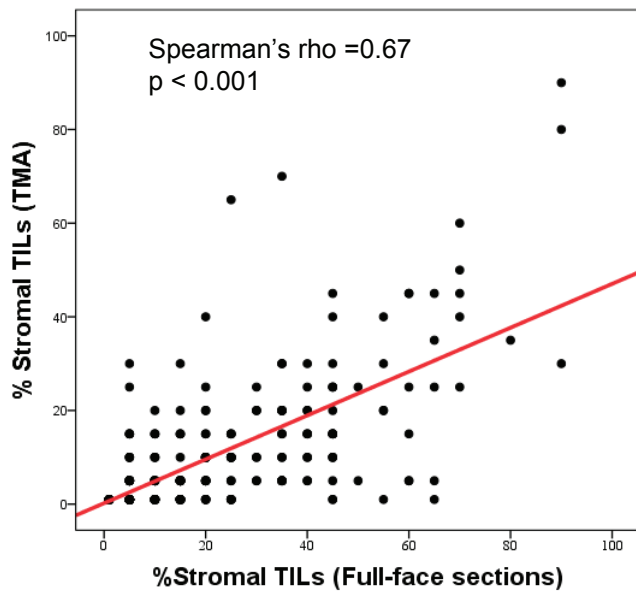

**Supplementary Fig. 4:** Scatter plot showing correlation between morphologically assessed stromal TILs on full-face sections and tissue microarrays in BC Cancer series (n=317). Each data point represents one case. The Spearman correlation coefficient (*rho*) and p-values are displayed. Abbreviations: TILs, tumor infiltrating lymphocytes; TMA, tissue microarray.

**Supplementary Tables:****Supplementary Table 1: Association of DNA-PKcs expression with clinicopathological features in the UBC series**

| Clinicopathological Features     | DNA-PKcs Expression (IHC score) |                      | P-value |
|----------------------------------|---------------------------------|----------------------|---------|
|                                  | Low (< 6)<br>n = 233            | High (≥ 6)<br>n = 67 |         |
| Age at diagnosis                 |                                 |                      | 0.51    |
| < 50                             | 87 (37.3)                       | 28 (41.8)            |         |
| ≥ 50                             | 146 (62.7)                      | 39 (58.2)            |         |
| Tumor size (cm)                  |                                 |                      | 0.97    |
| ≤ 2 cm                           | 135 (57.9)                      | 39 (58.2)            |         |
| >2 cm                            | 98 (42.1)                       | 28 (41.8)            |         |
| Tumor grade                      |                                 |                      | <0.001  |
| Grade 1 or 2                     | 145 (63)                        | 22 (32.8)            |         |
| Grade 3                          | 85 (37)                         | 45 (67.2)            |         |
| Axillary lymph node status       |                                 |                      | 0.10    |
| Positive                         | 76 (35.5)                       | 31 (48.4)            |         |
| Negative                         | 138 (64.5)                      | 33 (51.6)            |         |
| Lymphovascular invasion          |                                 |                      | 0.01    |
| Positive                         | 46 (20.6)                       | 24 (35.8)            |         |
| Negative                         | 177 (79.4)                      | 43 (64.2)            |         |
| Ki-67 (%)                        |                                 |                      | <0.001  |
| < 14                             | 147 (64.5)                      | 24 (36.4)            |         |
| ≥ 14%                            | 81 (35.5)                       | 42 (63.6)            |         |
| ER expression                    |                                 |                      | 0.007   |
| Negative                         | 41 (17.8)                       | 22 (33.3)            |         |
| Positive                         | 189 (82.2)                      | 44 (66.7)            |         |
| Progesterone receptor expression |                                 |                      | 0.06    |
| Negative                         | 69 (30.1)                       | 28 (42.4)            |         |
| Positive                         | 160 (69.9)                      | 38 (57.6)            |         |
| HER2 expression                  |                                 |                      | 0.14    |
| Negative                         | 217 (95.6)                      | 54 (87.1)            |         |
| Positive                         | 10 (4.4)                        | 8 (12.9)             |         |
| EGFR expression                  |                                 |                      | 0.004   |
| Negative                         | 211 (91.3)                      | 51 (78.5)            |         |
| Positive                         | 20 (8.7)                        | 14 (21.5)            |         |

|                                               |            |           |        |
|-----------------------------------------------|------------|-----------|--------|
| CK5/6 expression                              |            |           | 0.05   |
| Negative                                      | 217 (94.8) | 57 (87.7) |        |
| Positive                                      | 12 (5.2)   | 8 (12.3)  |        |
| IHC subtype                                   |            |           | <0.001 |
| Luminal A ([ER+ or PR+],<br>HER2-, low Ki67)  | 132 (59.2) | 18 (29.5) |        |
| Luminal B ([ER+ or PR+],<br>HER2-, high Ki67) | 51 (22.9)  | 20 (32.8) |        |
| Luminal B ([ER+ or PR+],<br>HER2+)            | 5 (2.2)    | 2 (3.3)   |        |
| ER-, PR-, HER2+                               | 5 (2.2)    | 6 (9.8)   |        |
| ER-, PR-, HER2-                               | 30 (13.5)  | 15 (24.6) |        |
| Triple negative phenotype                     |            |           | 0.03   |
| Yes                                           | 30 (13.5)  | 15 (24.6) |        |
| No                                            | 193 (86.5) | 46 (75.4) |        |
| Core basal subtype                            |            |           | 0.02   |
| Yes                                           | 17 (7.3)   | 11 (16.4) |        |
| No                                            | 216 (92.7) | 56 (83.6) |        |
| Stromal TILs (H&E)                            |            |           | 0.11   |
| < 10%                                         | 191 (82)   | 49 (73.1) |        |
| ≥ 10%                                         | 42 (18)    | 18 (26.9) |        |
| CD8 iTIL count                                |            |           | 0.006  |
| < 1                                           | 93 (49.2)  | 14 (27.5) |        |
| ≥ 1                                           | 96 (50.8)  | 37 (72.5) |        |

Abbreviations: IHC, immunohistochemistry; ER, estrogen receptor; PR, progesterone receptor; HER2, human epidermal growth factor receptor 2; EGFR, epidermal growth factor receptor; CK, cytokeratin; H&E, hematoxylin and eosin; CD, cluster of differentiation.



**Supplementary Data 1 (appears as an Excel file):** Characteristics of the BC Cancer series including pathological features for the whole cohort and genomic *PRKDC* mutation data for the ER+ subset.
